# Supplementary material for: The Perturbation of Ozone and Nitrogen Oxides Impacted by Blue Jet Considering the Molecular Diffusion
Source: MDPI journal article supplement (doi:10.3390/fluids8060176), 2023-06-07
Supplement: s1 [file s1]

## Supplementary Materials

### Sets of chemical reactions

**Table S1.** Main chemical reactions in blue jets. The rate coefficients are in units of  $s^{-1}$  for uni-molecular,  $cm^3 s^{-1}$  for two-body reaction, and  $cm^6 s^{-1}$  for three-body reactions. T is the gas temperature in Kelvin. M stands for  $N_2$  and  $O_2$  molecule.

| No.                 | Reaction                                  | Rate coefficient                         | Refer<br>ence |
|---------------------|-------------------------------------------|------------------------------------------|---------------|
| Electron attachment |                                           |                                          |               |
| 1                   | $e^- + O_3 \rightarrow O_2^- + O$         | $10^{-9}$                                | 3             |
| 2                   | $e^- + O_3 \rightarrow O^- + O_2$         | $10^{-11}$                               | 3             |
| 3                   | $e^- + O_3 + O_2 \rightarrow O_3^- + O_2$ | $10^{-31}$                               | 2             |
| 4                   | $e^- + NO \xrightarrow{M} NO^-$           | $10^{-30}$                               | 3             |
| 5                   | $e^- + NO_2 \rightarrow NO_2^-$           | $3 \times 10^{-11}$                      | 3             |
| 6                   | $e^- + NO_2 \rightarrow O^- + NO$         | $10^{-11}$                               | 3             |
| Electron detachment |                                           |                                          |               |
| 1                   | $O_2^- + O \rightarrow e^- + O_3$         | $1.5 \times 10^{-10}$                    | 3             |
| 2                   | $O_2^- + N \rightarrow e^- + NO_2$        | $5 \times 10^{-10}$                      | 3             |
| 3                   | $O^- + O_2(a) \rightarrow e^- + O_3$      | $3 \times 10^{-10}$                      | 3             |
| 4                   | $O^- + N_2 \rightarrow e^- + N_2O$        | $10^{-12}$                               | 2             |
| 5                   | $O^- + N \rightarrow e^- + NO$            | $2.6 \times 10^{-10}$                    | 3             |
| 6                   | $O^- + O_2 \rightarrow e^- + O_3$         | $5 \times 10^{-15}$                      | 3             |
| 7                   | $O^- + NO \rightarrow e^- + NO_2$         | $2.6 \times 10^{-10}$                    | 3             |
| 8                   | $O^- + O_3 \rightarrow e^- + O_2 + O_2$   | $5 \times 10^{-10} \times (T/300)^{0.5}$ | 5             |
| 9                   | $O_3^- + O \rightarrow e^- + O_2 + O_2$   | $3 \times 10^{-10}$                      | 3             |
| 10                  | $O_3^- + O_3 \rightarrow e^- + 3O_2$      | $10^{-10}$                               | 2             |
| 11                  | $NO^- + N_2O \rightarrow e^- + NO + N_2O$ | $5.1 \times 10^{-12}$                    | 2             |
| 12                  | $NO^- + NO \rightarrow e^- + NO + NO$     | $5 \times 10^{-12}$                      | 2             |
| 13                  | $NO_2^- + O \rightarrow e^- + NO_3$       | $10^{-12}$                               | 3             |

| Associative and Penning ionization |                                           |                                             |   |
|------------------------------------|-------------------------------------------|---------------------------------------------|---|
| 1                                  | $N(^2P) + O \rightarrow e^- + NO^+$       | $10^{-11}$                                  | 2 |
| Positive ion chemistry             |                                           |                                             |   |
| 1                                  | $N_2^+ + O \rightarrow NO^+ + N$          | $1.3 \times 10^{-10} \times (T/300)^{-0.5}$ | 3 |
| 2                                  | $N_2^+ + O_3 \rightarrow O_2^+ + O + N_2$ | $10^{-10}$                                  | 3 |
| 3                                  | $N_2^+ + N_2O \rightarrow N_2O^+ + N_2$   | $5 \times 10^{-10}$                         | 3 |
| 4                                  | $N_2^+ + N_2O \rightarrow NO^+ + N + N_2$ | $4 \times 10^{-10}$                         | 3 |
| 5                                  | $N_2^+ + NO \rightarrow NO^+ + N_2$       | $3.3 \times 10^{-10}$                       | 3 |
| 6                                  | $N_3^+ + O_2 \rightarrow NO_2^+ + N_2$    | $4.4 \times 10^{-11}$                       | 3 |
| 7                                  | $N_3^+ + NO \rightarrow N_2O^+ + N_2$     | $7 \times 10^{-11} \times (T/300)^{0.5}$    | 5 |
| 8                                  | $N_3^+ + NO \rightarrow NO^+ + N + N_2$   | $7 \times 10^{-11}$                         | 3 |
| 9                                  | $N_3^+ + NO \rightarrow N_2O^+ + N_2$     | $7 \times 10^{-11}$                         | 3 |
| 10                                 | $N_4^+ + NO \rightarrow NO^+ + N_2 + N_2$ | $4 \times 10^{-10}$                         | 3 |
| 11                                 | $N^+ + O \xrightarrow{M} NO^+$            | $10^{-29}$                                  | 3 |
| 12                                 | $N^+ + O_3 \rightarrow NO^+ + O_2$        | $5 \times 10^{-10}$                         | 3 |
| 13                                 | $N^+ + O_2 \rightarrow NO^+ + O$          | $5 \times 10^{-11} \times (T/300)^{0.5}$    | 5 |
| 14                                 | $N^+ + O_2 \rightarrow NO^+ + O(^1D)$     | $2 \times 10^{-10} \times (T/300)^{0.5}$    | 5 |
| 15                                 | $N^+ + O_2 \rightarrow O^+ + NO$          | $2.8 \times 10^{-11}$                       | 3 |
| 16                                 | $N^+ + NO \rightarrow NO^+ + N$           | $8 \times 10^{-10}$                         | 3 |
| 17                                 | $N^+ + NO \rightarrow N_2^+ + O$          | $3 \times 10^{-12}$                         | 3 |
| 18                                 | $N^+ + NO \rightarrow O^+ + N_2$          | $10^{-12}$                                  | 3 |
| 19                                 | $N^+ + N_2O \rightarrow NO^+ + N_2$       | $5.5 \times 10^{-10}$                       | 3 |
| 20                                 | $O_2^+ + N_2 \rightarrow NO^+ + NO$       | $4 \times 10^{-21} \times (T/300)^{-2}$     | 6 |
| 21                                 | $O_2^+ + N \rightarrow NO^+ + O$          | $1.2 \times 10^{-10}$                       | 3 |
| 22                                 | $O_2^+ + NO \rightarrow NO^+ + O_2$       | $4.4 \times 10^{-10}$                       | 3 |
| 23                                 | $O_2^+ + NO_2 \rightarrow NO_2^+ + O_2$   | $6.6 \times 10^{-10}$                       | 3 |

|                        |                                            |                                                                 |   |
|------------------------|--------------------------------------------|-----------------------------------------------------------------|---|
| 24                     | $O_2^+ + NO_2 \rightarrow NO^+ + O_3$      | $10^{-11}$                                                      | 3 |
| 25                     | $O_4^+ + O \rightarrow O_2^+ + O_3$        | $3 \times 10^{-10}$                                             | 3 |
| 26                     | $O_4^+ + NO \rightarrow NO^+ + O_2 + O_2$  | $10^{-10}$                                                      | 3 |
| 27                     | $O^+ + N \xrightarrow{M} NO^+$             | $10^{-29}$                                                      | 3 |
| 28                     | $O^+ + N_2 \rightarrow NO^+ + N$           | $1.2 \times 10^{-12} \times (T/300)^{-1}$                       | 5 |
| 29                     | $O^+ + N_2 \xrightarrow{M} NO^+ + N$       | $6 \times 10^{-29} \times (T/300)^{-2}$                         | 3 |
| 30                     | $O^+ + NO_2 \rightarrow NO_2^+ + O$        | $1.6 \times 10^{-9}$                                            | 3 |
| 31                     | $O^+ + NO \rightarrow NO^+ + O$            | $2.4 \times 10^{-11}$                                           | 3 |
| 32                     | $O^+ + NO \rightarrow O_2^+ + N$           | $3 \times 10^{-12}$                                             | 3 |
| 33                     | $O^+ + N_2O \rightarrow N_2O^+ + O$        | $4 \times 10^{-10}$                                             | 3 |
| 34                     | $O^+ + N_2O \rightarrow NO^+ + NO$         | $2.3 \times 10^{-10}$                                           | 3 |
| 35                     | $O^+ + N_2O \rightarrow O_2^+ + N_2$       | $2 \times 10^{-11}$                                             | 3 |
| 36                     | $O^+ + O_3 \rightarrow O_2^+ + O_2$        | $10^{-10}$                                                      | 3 |
| 37                     | $NO_2^+ + NO \rightarrow NO^+ + NO_2$      | $2.9 \times 10^{-10}$                                           | 3 |
| 38                     | $N_2O^+ + NO \rightarrow NO^+ + N_2O$      | $2.9 \times 10^{-10}$                                           | 3 |
| 39                     | $NO^+ + O_3 \rightarrow NO_2^+ + O_2$      | $10^{-15}$                                                      | 3 |
| 40                     | $NO^+ + N_2O_5 \rightarrow NO_2^+ + 2NO_2$ | $5.9 \times 10^{-10}$                                           | 3 |
| 41                     | $NO^+(N_2) \xrightarrow{M} NO^+ + N_2$     | $1.5 \times 10^{-8} \times (T/300)^{-5.3} \times \exp(-2093/T)$ | 6 |
| 42                     | $NO^+(N_2) + O_2 \rightarrow NO^+ + N_2$   | $10^{-9}$                                                       | 6 |
| 43                     | $NO^+(O_2) + N_2 \rightarrow NO^+ + O_2$   | $10^{-9}$                                                       | 6 |
| Negative ion chemistry |                                            |                                                                 |   |
| 1                      | $e^- + O_3 \rightarrow e^- + O_2 + O$      | $10^{-8}$                                                       | 2 |
| 2                      | $O^- + O_2 \rightarrow O_3^- + O$          | $5.3 \times 10^{-10}$                                           | 3 |
| 3                      | $O^- + O_2 \xrightarrow{M} O_3^-$          | $1.1 \times 10^{-30} \times (T/300)^{-1}$                       | 3 |
| 4                      | $O_2^- + O_3 \rightarrow O_3^- + O_2$      | $4 \times 10^{-10}$                                             | 3 |
| 5                      | $O_3^- + O \rightarrow O_2^- + O_2$        | $3.2 \times 10^{-10}$                                           | 3 |

|                            |                                           |                                            |   |
|----------------------------|-------------------------------------------|--------------------------------------------|---|
| 6                          | $O_4^- + O \rightarrow O_3^- + O_2$       | $4 \times 10^{-10}$                        | 3 |
| 7                          | $O^- + NO \xrightarrow{M} NO_2^-$         | $10^{-29}$                                 | 3 |
| 8                          | $O^- + NO_2 \rightarrow NO_2^- + O$       | $1.2 \times 10^{-9}$                       | 3 |
| 9                          | $O^- + N_2O \rightarrow NO^- + NO$        | $2 \times 10^{-10}$                        | 3 |
| 10                         | $O_2^- + NO_2 \rightarrow NO_2^- + O_2$   | $8 \times 10^{-10}$                        | 3 |
| 11                         | $O_3^- + NO \rightarrow NO_2^- + O_2$     | $2.6 \times 10^{-12}$                      | 3 |
| 12                         | $O_3^- + NO \rightarrow NO_3^- + O$       | $10^{-11}$                                 | 3 |
| 13                         | $O_3^- + NO_2 \rightarrow NO_2^- + O_3$   | $7 \times 10^{-10}$                        | 3 |
| 14                         | $O_3^- + NO_2 \rightarrow NO_3^- + O_2$   | $2 \times 10^{-11}$                        | 3 |
| 15                         | $O_3^- + NO_3 \rightarrow NO_3^- + O_3$   | $5 \times 10^{-10}$                        | 3 |
| 16                         | $NO^- + O_2 \rightarrow O_2^- + NO$       | $5 \times 10^{-10}$                        | 3 |
| 17                         | $NO^- + NO_2 \rightarrow NO_2^- + NO$     | $7.4 \times 10^{-16}$                      | 3 |
| 18                         | $NO^- + N_2O \rightarrow NO_2^- + N_2$    | $2.8 \times 10^{-14}$                      | 3 |
| 19                         | $NO_2^- + O_3 \rightarrow NO_3^- + O_2$   | $1.8 \times 10^{-11}$                      | 3 |
| 20                         | $NO_2^- + NO_2 \rightarrow NO_3^- + NO$   | $4 \times 10^{-12}$                        | 3 |
| 21                         | $NO_2^- + NO_3 \rightarrow NO_3^- + NO_2$ | $5 \times 10^{-10}$                        | 3 |
| 22                         | $NO_3^- + NO \rightarrow NO_2^- + NO_2$   | $3 \times 10^{-15}$                        | 3 |
| Electron-ion recombination |                                           |                                            |   |
| 1                          | $e^- + NO^+ \xrightarrow{M} NO$           | $6 \times 10^{-27} \times (T/300)^{-1.5}$  | 3 |
| 2                          | $e^- + NO^+ \rightarrow N + O$            | $4 \times 10^{-7} \times (T/300)^{-1.5}$   | 3 |
| 3                          | $e^- + NO^+ \rightarrow N(^2D) + O$       | $3 \times 10^{-7} \times (T/300)^{-1}$     | 3 |
| 4                          | $e^- + NO^+(N_2) \rightarrow NO + N_2$    | $1.3 \times 10^{-6} \times (T/300)^{-0.5}$ | 3 |
| 5                          | $e^- + NO^+(O_2) \rightarrow NO + O_2$    | $1.3 \times 10^{-6} \times (T/300)^{-0.5}$ | 3 |
| 6                          | $e^- + NO_2^+ \rightarrow NO + O$         | $2 \times 10^{-7} \times (T/300)^{-0.5}$   | 3 |
| 7                          | $e^- + N_2O^+ \rightarrow O + N_2$        | $1.3 \times 10^{-6} \times (T/300)^{-0.5}$ | 3 |
| Neutral chemistry          |                                           |                                            |   |

|    |                                                                                       |                                               |   |
|----|---------------------------------------------------------------------------------------|-----------------------------------------------|---|
| 1  | $\text{N} + \text{O}_2 \rightarrow \text{NO} + \text{O}$                              | $1.5 \times 10^{-11} \times \exp(-3600/T)$    | 4 |
| 2  | $\text{N} + \text{O}_3 \rightarrow \text{NO} + \text{O}_2$                            | $10^{-16}$                                    | 4 |
| 3  | $\text{N} + \text{NO} \rightarrow \text{N}_2 + \text{O}$                              | $2.1 \times 10^{-11} \times \exp(-100/T)$     | 4 |
| 4  | $\text{N} + \text{NO}_2 \rightarrow \text{N}_2\text{O} + \text{O}$                    | $3 \times 10^{-12}$                           | 3 |
| 5  | $\text{N} + \text{NO}_2 \rightarrow \text{NO} + \text{NO}$                            | $2.3 \times 10^{-12}$                         | 3 |
| 6  | $\text{N} + \text{NO}_2 \rightarrow \text{N}_2 + \text{O}$                            | $9.1 \times 10^{-13}$                         | 3 |
| 7  | $\text{N} + \text{NO}_2 \rightarrow \text{N}_2 + \text{O}_2$                          | $7 \times 10^{-13}$                           | 3 |
| 8  | $\text{N} + \text{O} \xrightarrow{\text{M}} \text{NO}$                                | $1.76 \times 10^{-31} \times T^{-0.5}$        | 3 |
| 9  | $\text{O} + \text{O}_3 \rightarrow \text{O}_2 + \text{O}_2$                           | $8 \times 10^{-12} \times \exp(-2060/T)$      | 4 |
| 10 | $\text{O} + \text{NO}_2 \rightarrow \text{NO} + \text{O}_2$                           | $5.1 \times 10^{-12} \times \exp(210/T)$      | 4 |
| 11 | $\text{O} + \text{NO}_3 \rightarrow \text{NO}_2 + \text{O}_2$                         | $10^{-11}$                                    | 4 |
| 12 | $\text{O} + \text{O}_2 \xrightarrow{\text{M}} \text{O}_3$                             | $6 \times 10^{-34} \times (T/300)^{-2.4}$     | 4 |
| 13 | $\text{O} + \text{NO} \xrightarrow{\text{M}} \text{NO}_2$                             | $9 \times 10^{-32} \times (T/300)^{-1.5}$     | 4 |
| 14 | $\text{O} + \text{O}_3 + \text{O}_2 \rightarrow \text{O}_3 + \text{O}_3 + \text{O}_2$ | $1.5 \times 10^{-34} \times \exp(750/T)$      | 2 |
| 15 | $\text{O} + \text{O} + \text{O}_2 \rightarrow \text{O}_2 + \text{O}_3 + \text{O}$     | $2.15 \times 10^{-34} \times \exp(345/T)$     | 2 |
| 16 | $\text{O} + \text{NO}_2 \xrightarrow{\text{M}} \text{NO}_3$                           | $2.5 \times 10^{-31} \times (T/300)^{-1.8}$   | 4 |
| 17 | $\text{O} + \text{NO} \rightarrow \text{NO}_2$                                        | $3.02 \times 10^{-11} \times (T/300)^{-0.75}$ | 2 |
| 18 | $\text{NO} + \text{NO}_3 \rightarrow \text{NO}_2 + \text{NO}_2$                       | $1.5 \times 10^{-11} \times \exp(170/T)$      | 4 |
| 19 | $\text{NO} + \text{O}_3 \rightarrow \text{NO}_2 + \text{O}_2$                         | $3 \times 10^{-12} \times \exp(-1500/T)$      | 4 |
| 20 | $\text{NO}_2 + \text{O}_3 \rightarrow \text{NO}_3 + \text{O}_2$                       | $1.2 \times 10^{-13} \times \exp(-2450/T)$    | 4 |
| 21 | $\text{NO}_2 + \text{NO}_3 \rightarrow \text{NO} + \text{NO}_2 + \text{O}_2$          | $2.3 \times 10^{-13} \times \exp(-1600/T)$    | 9 |
| 22 | $\text{NO}_2 + \text{NO}_3 \xrightarrow{\text{M}} \text{N}_2\text{O}_5$               | $2.4 \times 10^{-30} \times (T/300)^{-3}$     | 4 |
| 23 | $\text{NO}_3 + \text{NO}_3 \rightarrow \text{NO}_2 + \text{NO}_2 + \text{O}_2$        | $8.5 \times 10^{-13} \times \exp(-2450/T)$    | 4 |
| 24 | $\text{N}(^2\text{D}) + \text{O}_2 \rightarrow \text{NO} + \text{O}$                  | $1.5 \times 10^{-12} \times (T/300)^{0.5}$    | 3 |
| 25 | $\text{N}(^2\text{D}) + \text{O}_2 \rightarrow \text{NO} + \text{O}(^1\text{D})$      | $6 \times 10^{-12} \times (T/300)^{0.5}$      | 3 |
| 26 | $\text{N}(^2\text{D}) + \text{N}_2\text{O} \rightarrow \text{NO} + \text{N}_2$        | $3.5 \times 10^{-12}$                         | 2 |

|    |                                                                                                             |                                            |   |
|----|-------------------------------------------------------------------------------------------------------------|--------------------------------------------|---|
| 27 | $\text{N}(^2\text{D}) + \text{NO} \rightarrow \text{N}_2 + \text{O}$                                        | $1.8 \times 10^{-10}$                      | 2 |
| 28 | $\text{N}(^2\text{D}) + \text{NO} \rightarrow \text{N}_2\text{O}$                                           | $6 \times 10^{-11}$                        | 3 |
| 29 | $\text{N}(^2\text{P}) + \text{O}_2 \rightarrow \text{NO} + \text{O}$                                        | $2.6 \times 10^{-12}$                      | 3 |
| 30 | $\text{N}(^2\text{P}) + \text{NO} \rightarrow \text{O} + \text{N}_2$                                        | $3 \times 10^{-11}$                        | 2 |
| 31 | $\text{O}(^1\text{D}) + \text{O}_3 \rightarrow 2\text{O} + \text{O}_2$                                      | $2.4 \times 10^{-10}$                      | 4 |
| 32 | $\text{O}(^1\text{D}) + \text{O}_3 \rightarrow \text{O}_2 + \text{O}_2$                                     | $2.4 \times 10^{-10}$                      | 4 |
| 33 | $\text{O}(^1\text{D}) + \text{O}_3 \rightarrow \text{O} + \text{O}_3$                                       | $2.4 \times 10^{-10}$                      | 4 |
| 34 | $\text{O}(^1\text{D}) + \text{N}_2\text{O} \rightarrow \text{NO} + \text{NO}$                               | $1.19 \times 10^{-10} \times \exp(20/T)$   | 4 |
| 35 | $\text{O}(^1\text{D}) + \text{N}_2\text{O} \rightarrow \text{N}_2 + \text{O}_2$                             | $1.19 \times 10^{-10} \times \exp(20/T)$   | 4 |
| 36 | $\text{O}(^1\text{D}) + \text{N}_2\text{O} \rightarrow \text{O} + \text{N}_2\text{O}$                       | $1.19 \times 10^{-10} \times \exp(20/T)$   | 4 |
| 37 | $\text{O}(^1\text{D}) + \text{NO} \rightarrow \text{N} + \text{O}_2$                                        | $1.7 \times 10^{-10}$                      | 3 |
| 38 | $\text{O}(^1\text{D}) + \text{NO}_2 \rightarrow \text{NO} + \text{O}_2$                                     | $3 \times 10^{-10}$                        | 2 |
| 39 | $\text{O}(^1\text{S}) + \text{O}_3 \rightarrow \text{O}(^1\text{D}) + \text{O} + \text{O}_2$                | $2.9 \times 10^{-10}$                      | 3 |
| 40 | $\text{O}(^1\text{S}) + \text{O}_3 \rightarrow \text{O}_2 + \text{O}_2$                                     | $2.9 \times 10^{-10}$                      | 3 |
| 41 | $\text{O}(^1\text{S}) + \text{NO} \rightarrow \text{NO} + \text{O}$                                         | $1.8 \times 10^{-10}$                      | 3 |
| 42 | $\text{O}(^1\text{S}) + \text{NO} \rightarrow \text{O}(^1\text{D}) + \text{NO}$                             | $3.2 \times 10^{-10}$                      | 3 |
| 43 | $\text{O}(^1\text{S}) + \text{N}_2\text{O} \rightarrow \text{N}_2\text{O} + \text{O}$                       | $6.3 \times 10^{-12}$                      | 3 |
| 44 | $\text{O}(^1\text{S}) + \text{N}_2\text{O} \rightarrow \text{O}(^1\text{D}) + \text{N}_2\text{O}$           | $3.1 \times 10^{-12}$                      | 3 |
| 45 | $\text{O}_2(\text{a}) + \text{N} \rightarrow \text{O} + \text{NO}$                                          | $2 \times 10^{-14} \times \exp(-600/T)$    | 3 |
| 46 | $\text{O}_2(\text{a}) + \text{NO} \rightarrow \text{O} + \text{NO}_2$                                       | $4.88 \times 10^{-18}$                     | 2 |
| 47 | $\text{O}_2(\text{a}) + \text{NO} \rightarrow \text{NO} + \text{O}_2$                                       | $2.48 \times 10^{-17}$                     | 7 |
| 48 | $\text{O}_2(\text{a}) + \text{O}_3 \rightarrow \text{O}(^1\text{D}) + \text{O}_2 + \text{O}_2$              | $5.2 \times 10^{-11} \times \exp(-2840/T)$ | 5 |
| 49 | $\text{O}_2(\text{a}) + \text{O}_3 \rightarrow \text{O} + \text{O}_2 + \text{O}_2$                          | $5.2 \times 10^{-11} \times \exp(-2840/T)$ | 4 |
| 50 | $\text{O}_2(\text{a}) + \text{O}_2(\text{a}) + \text{O}_2 \rightarrow \text{O}_3 + \text{O}_3 + \text{O}_2$ | $10^{-31} \times (T/300)^{0.5}$            | 5 |
| 51 | $\text{O}_2(\text{b}) + \text{O}_3 \rightarrow 2\text{O}_2(\text{a}) + \text{O}$                            | $3.5 \times 10^{-11} \times \exp(-135/T)$  | 4 |
| 52 | $\text{O}_2(\text{b}) + \text{NO} \rightarrow \text{O}_2(\text{a}) + \text{NO}$                             | $4 \times 10^{-14}$                        | 3 |

|                       |                                                                     |                                          |   |
|-----------------------|---------------------------------------------------------------------|------------------------------------------|---|
| 53                    | $N_2(A) + O_2 \rightarrow N_2O + O$                                 | $7.8 \times 10^{-14}$                    | 3 |
| 54                    | $N_2(A) + O \rightarrow N(^2D) + NO$                                | $7 \times 10^{-12}$                      | 3 |
| 55                    | $N_2(A) + NO \rightarrow N_2 + NO$                                  | $7 \times 10^{-11}$                      | 3 |
| 56                    | $N_2(A) + N_2O \rightarrow N_2 + N + NO$                            | $10^{-11}$                               | 3 |
| 57                    | $N_2(B) + NO \rightarrow N_2(A) + NO$                               | $2.4 \times 10^{-10}$                    | 3 |
| 58                    | $N_2(a'^1) + NO \rightarrow N_2 + N + O$                            | $3.6 \times 10^{-10}$                    | 3 |
| 59                    | $N_2(a^1) + NO \rightarrow N_2 + N + O$                             | $3.6 \times 10^{-10}$                    | 2 |
| 60                    | $O_3 \xrightarrow{h\nu} O_2 + O$                                    | $f(h\nu)$                                | 1 |
| 61                    | $O_3 \xrightarrow{h\nu} O_2 + O(^1D)$                               | $f(h\nu)$                                | 1 |
| 62                    | $NO \xrightarrow{h\nu} N + O$                                       | $f(h\nu)$                                | 1 |
| 63                    | $NO_2 \xrightarrow{h\nu} NO + O$                                    | $f(h\nu)$                                | 1 |
| 64                    | $NO_3 \xrightarrow{h\nu} NO_2 + O$                                  | $f(h\nu)$                                | 1 |
| 65                    | $N_2O \xrightarrow{h\nu} O(^1D) + N_2$                              | $f(h\nu)$                                | 1 |
| Ion-ion recombination |                                                                     |                                          |   |
| 1                     | $A^- + (BC)^+ \rightarrow A + B + C$                                | $10^{-7}$                                | 3 |
|                       | $A^- = [O_3^-, NO^-, NO_2^-]$ and $(BC)^+ = [NO^+, NO_2^+, N_2O^+]$ |                                          |   |
| 2                     | $O_3^- + A^+ \rightarrow 2O_2 + A$                                  | $10^{-7}$                                | 3 |
|                       | $A^+ = [NO^+, NO_2^+, N_2O^+]$                                      |                                          |   |
| 3                     | $A^- + B^+ \rightarrow A + B$                                       | $2 \times 10^{-7} \times (T/300)^{-0.5}$ | 3 |
|                       | $A^- = [O_3^-, NO^-, NO_2^-]$ and $B^+ = [NO_2^+, N_2O^+]$          |                                          |   |

## References

1. Chipperfield, M.P. Multiannual simulations with a three-dimensional chemical transport model. *J. Geophys. Res. Atmos.* **1999**, *104*, 1781–1805.
2. Gordillo-Vázquez, F.J. Air plasma kinetics under the influence of sprites. *J. Phys. D Appl. Phys.* **2008**, *41*, 234016.
3. Kossyi, I.A.; Kostinsky, A.Y.; Matveyev, A.A.; and Silakov, V.P. Kinetic scheme of the non-equilibrium discharge in nitrogen-oxygen mixtures. *Plasma Sources Sci. Technol.* **1992**, *1*, 207.
4. Sander, S.P.; Golden, D.M.; Kurylo, M.J.; Moortgat, G.K.; Wine, P.H.; Ravishankara, A.R.; Kolb, C.E.; Molina, M.J.; Finlayson-Pitts, B.J.; Orkin, V.L. *Chemical Kinetics and Photochemical Data for Use in Atmospheric Studies Evaluation Number 15*; Jet Propulsion Laboratory, National Aeronautics and Space Administration: Pasadena, CA, USA, 2006.
5. Sentman, D.D.; Stenbaek-Nielsen, H.C.; McHarg, M.G.; and Morrill, J.S. Correction to “Plasma chemistry of sprite streamers”. *J. Geophys. Res. Atmos.* **2008**, *113*, D14399.
6. Viggiano, A.A. Much improved upper limit for the rate constant for the reaction of  $O_2^+$  with  $N_2$ . *J. Phys. Chem. A* **2006**, *110*, 11599–11601.
7. Yaron, M.; Von Engel, A.; Vidaud, P.H. The collisional quenching of  $O_2^*(1\Delta_g)$  by NO and CO<sub>2</sub>. *Chem. Phys. Lett.* **1976**, *37*, 159–161.
